# Supplementary material
Source: MDPI journal article supplement (https://www.mdpi.com/2673-4931/22/1/61)
Supplement: s1 [file s1]

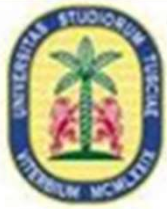

UNIVERSITÀ  
DEGLI STUDI DELLA  
Tuscia

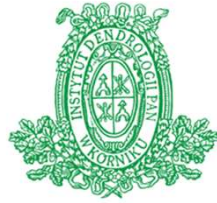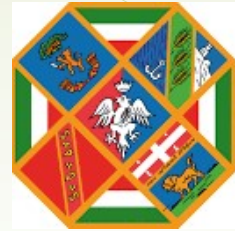

# GIS-AHP Approach to Select the Most Suitable Extraction System in Mediterranean Oak Coppices Under Environmental Constraints

Damiano Tocci <sup>1</sup>, Francesco Latterini <sup>2</sup>,  
Rachele Venanzi <sup>1</sup>,  
Pierluca Gaglioppa <sup>3</sup>,  
Rodolfo Picchio <sup>1</sup>

Correspondence: [venanzi@unitus.it](mailto:venanzi@unitus.it)

- 1 Tuscia University, DAFNE Department
- 2 Institute of Dendrology, Polish Academy of Sciences
- 3 Lazio Region

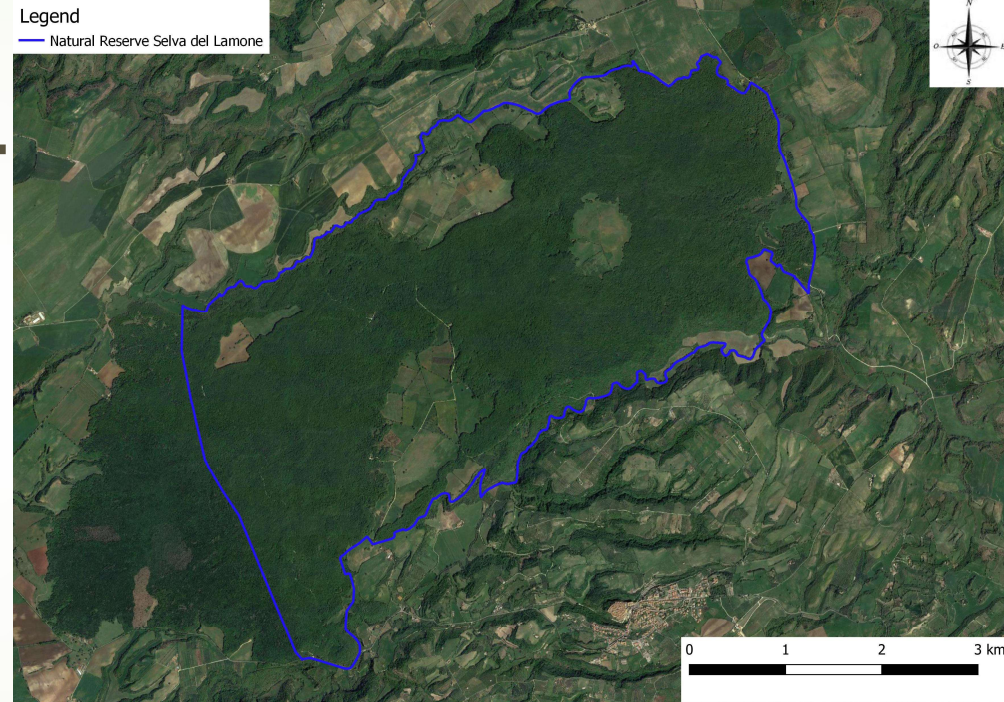

# GIS-AHP Approach to Select the Most Suitable Extraction System in Mediterranean Oak Coppices Under Environmental Constraints

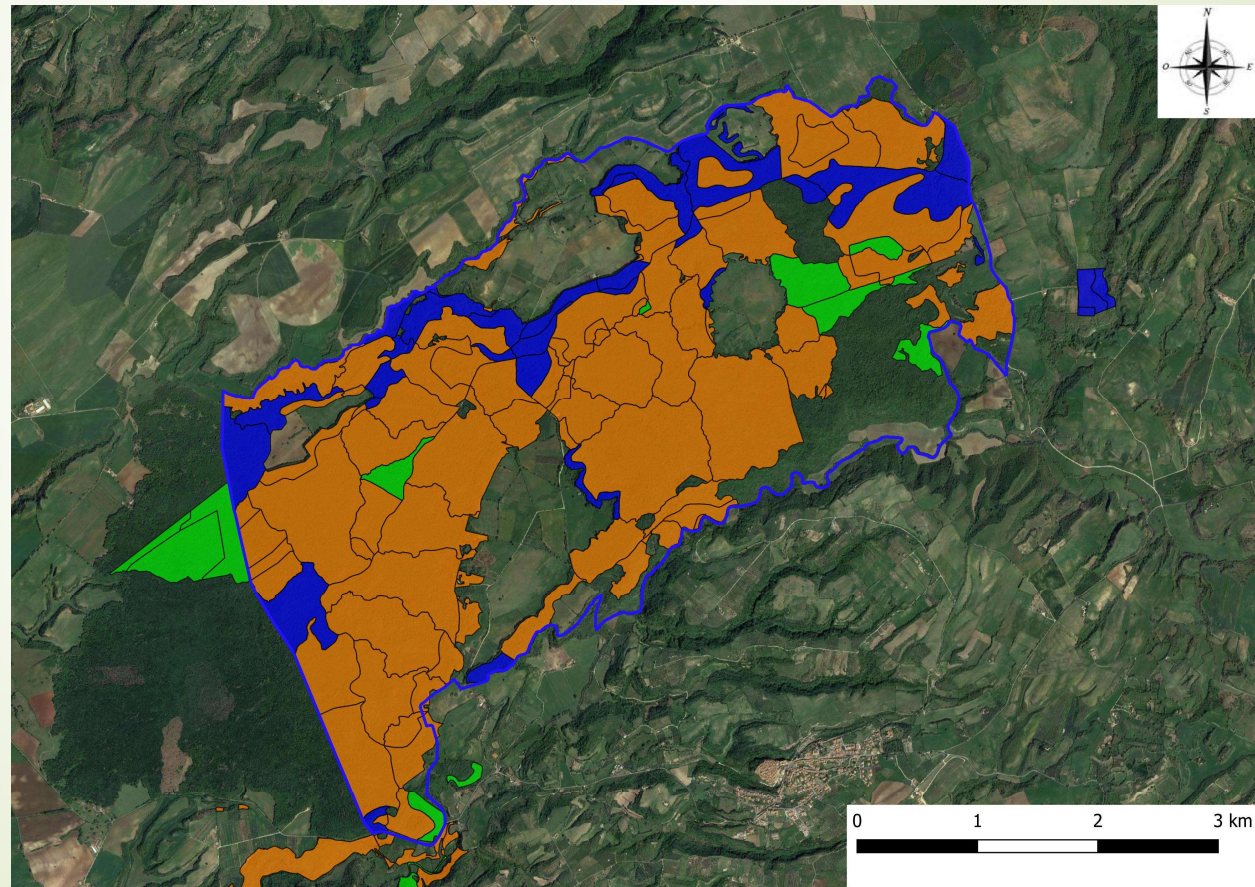

## ABSTRACT

The selection of the most suitable alternative for harvesting operations is a challenging activity which is manageable with the precision forest harvesting approach. In details, an approach based on a combination of GIS (Geographic Information System) and AHP (Analytic Hierarchy Process), relying on geospatial data and opinion of experts in the topic of forest engineering was applied in the Natural Reserve of Lamone (Latium, Italy) to select the most suitable extraction system in the oak coppice forests of the study area. The developed approach allowed for the selection among forwarder, forestry-fitted farm tractor equipped with winch and all-terrain cable yarder. The obtained results indicated that forwarder was the most suitable extraction system for the major part of the study area, while the application of winch was limited to forest parcel with high forest road density. All-terrain cable yarder was instead identified as the best alternative only in areas with low soil bearing capacity.

## KEYWORDS

cable skidder, forwarder, cable yarder, roughness, slope

# INTRODUCTION

- The selection of the best alternative for timber extraction is a fundamental issue in the framework of sustainable forest operations
- There is the need to increase the level of objectivity in the choice, which, in the context of the study area, is currently generally left for the operational phase without a proper planning
- We developed a GIS-AHP approach to identify the best alternative for timber extraction in oak coppices located in Central Italy
- We considered three extraction machines: forwarder, cable skidder and all-terrain cable yarder
- Our study area was the Natural Reserve Selva del Lamone

# M & M

- Following the procedure developed by Latterini et al. (2022) we retrieved, from the local forest management plan and from preliminary GIS analysis, data about 6 environmental and operational variables
- Slope (%)
- Extraction distance (m)
- Roughness (%)
- Soil bearing capacity (kPa)
- Extracted timber amount (m<sup>3</sup>/ha)
- Viability density (m/ha)

# Slope

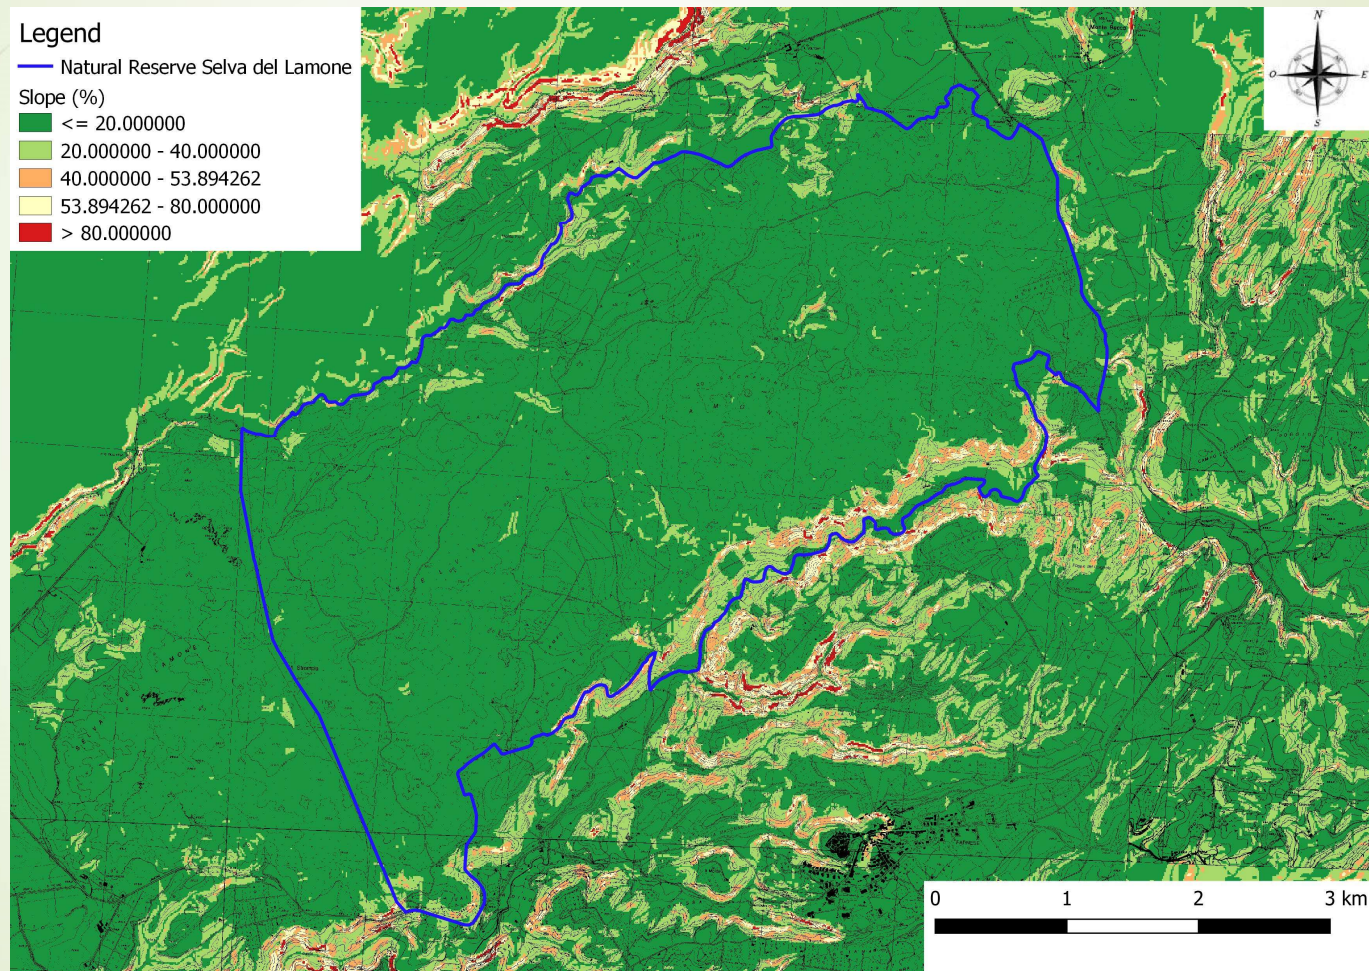

# Extraction distance

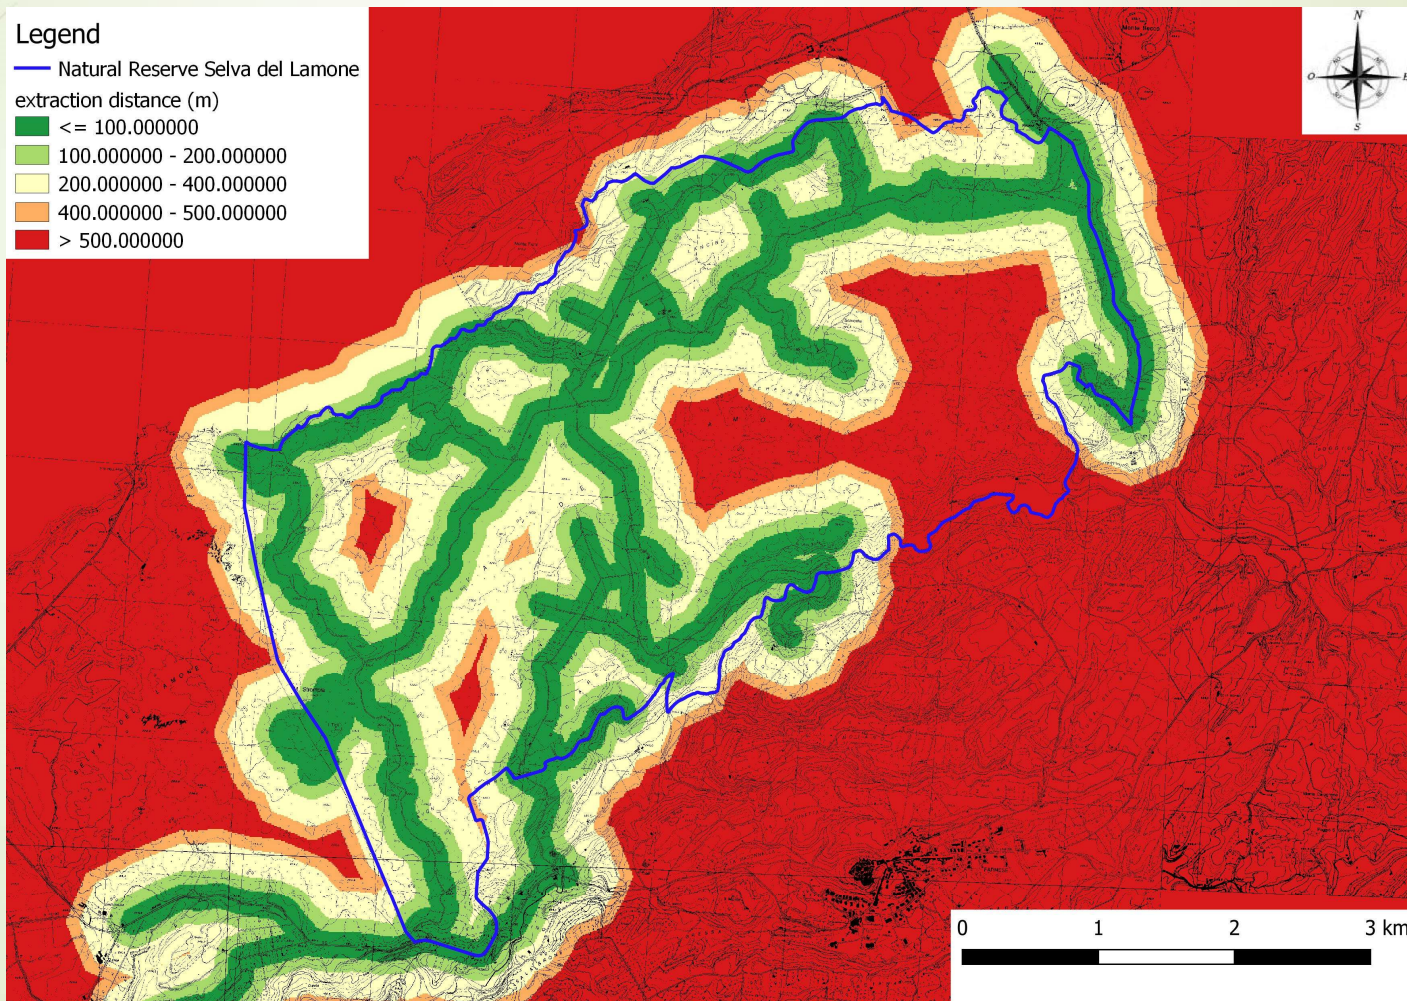

# Extracted timber amount

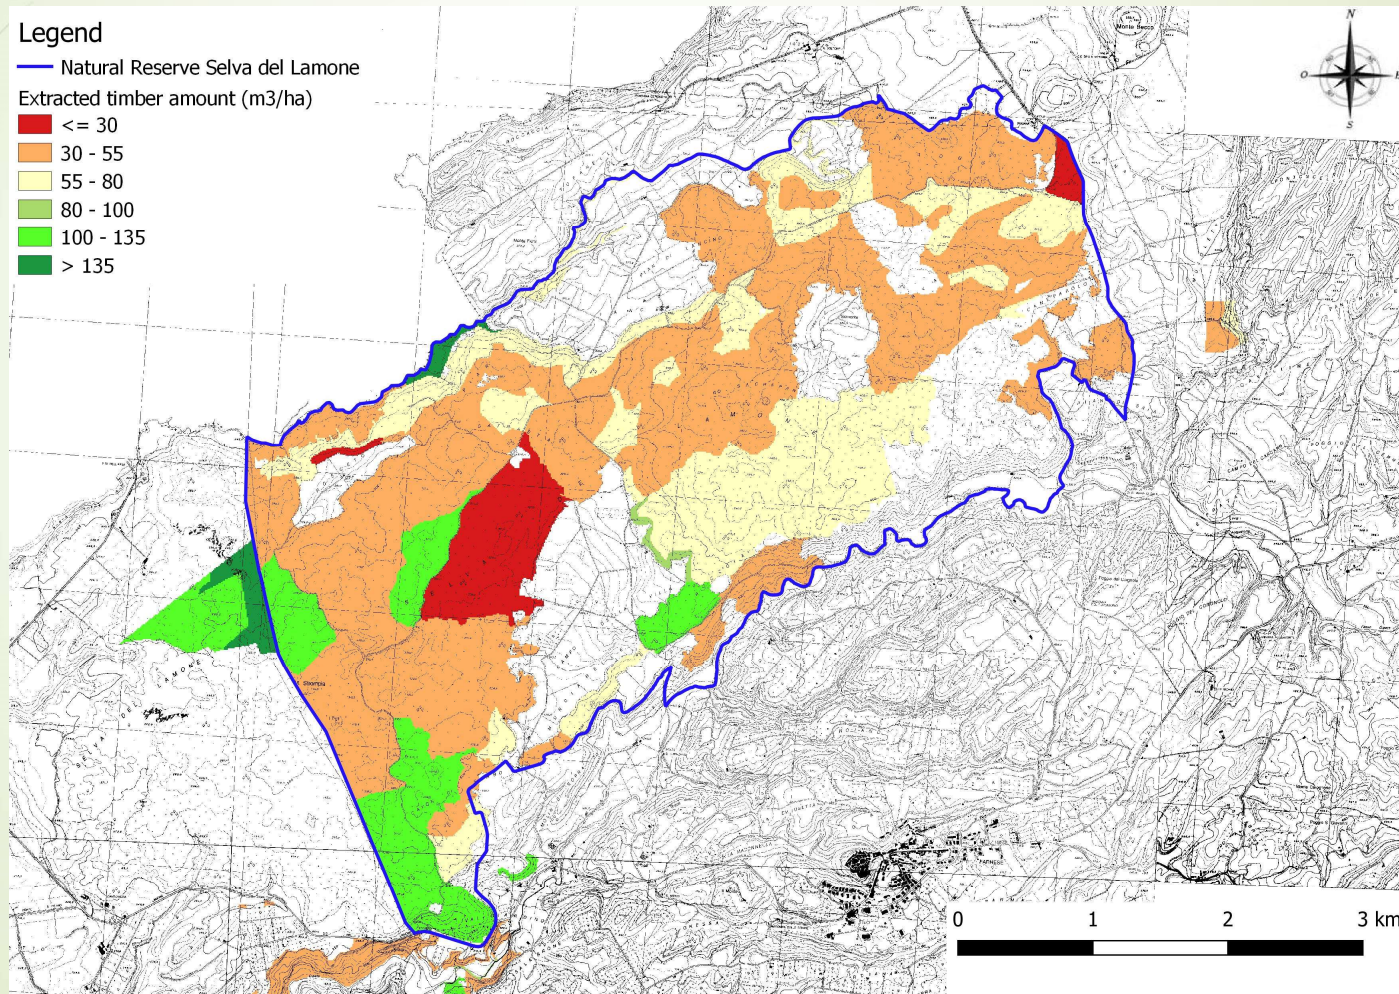



# Soil bearing capacity

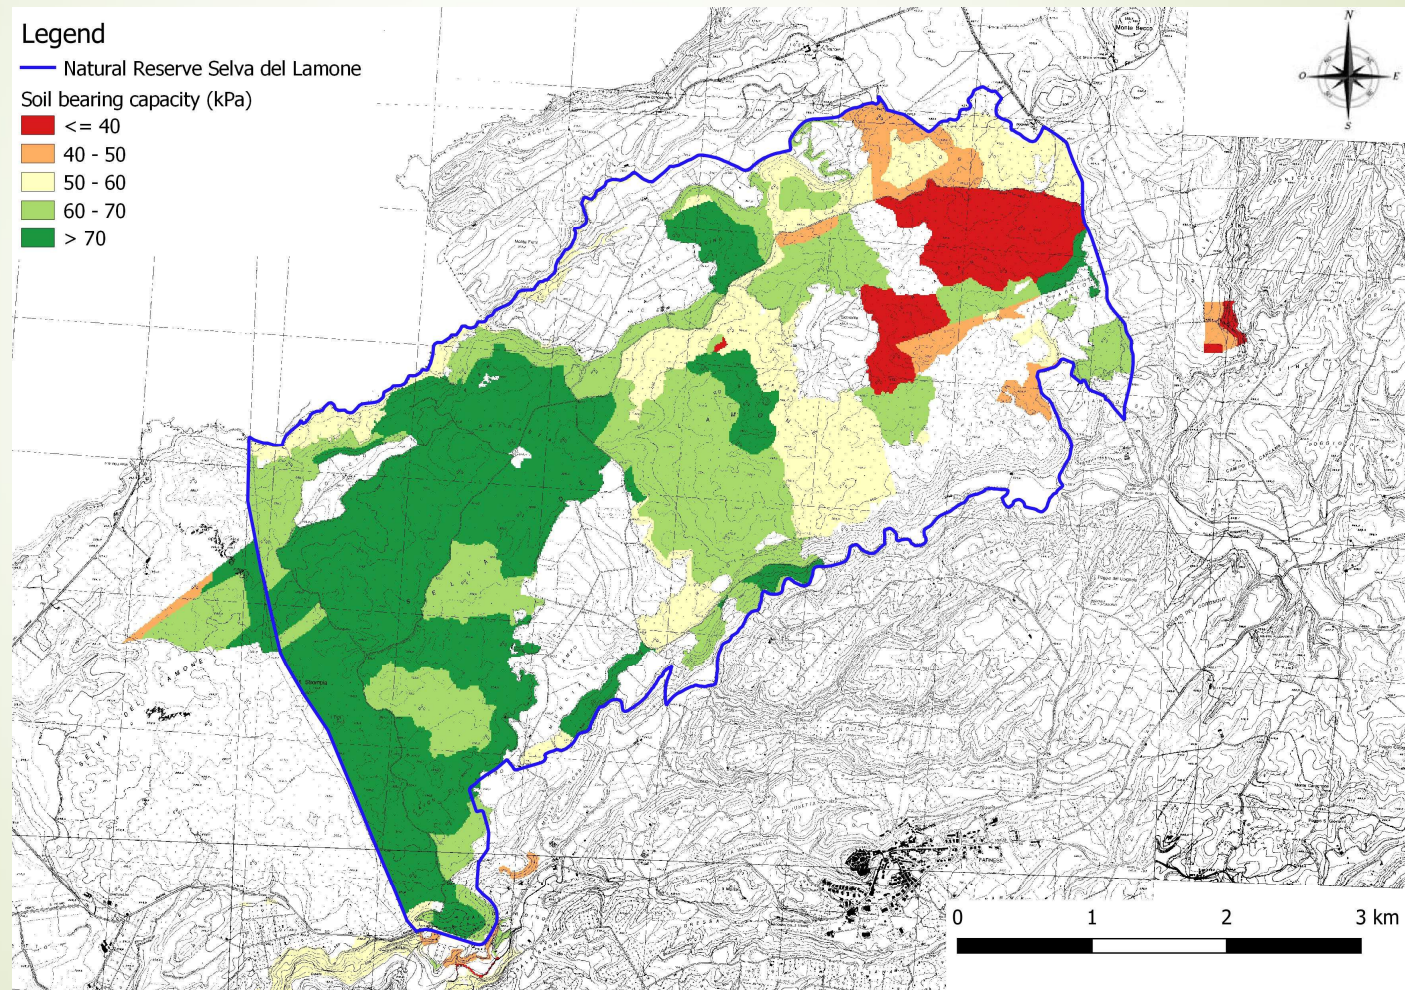

# Viability density

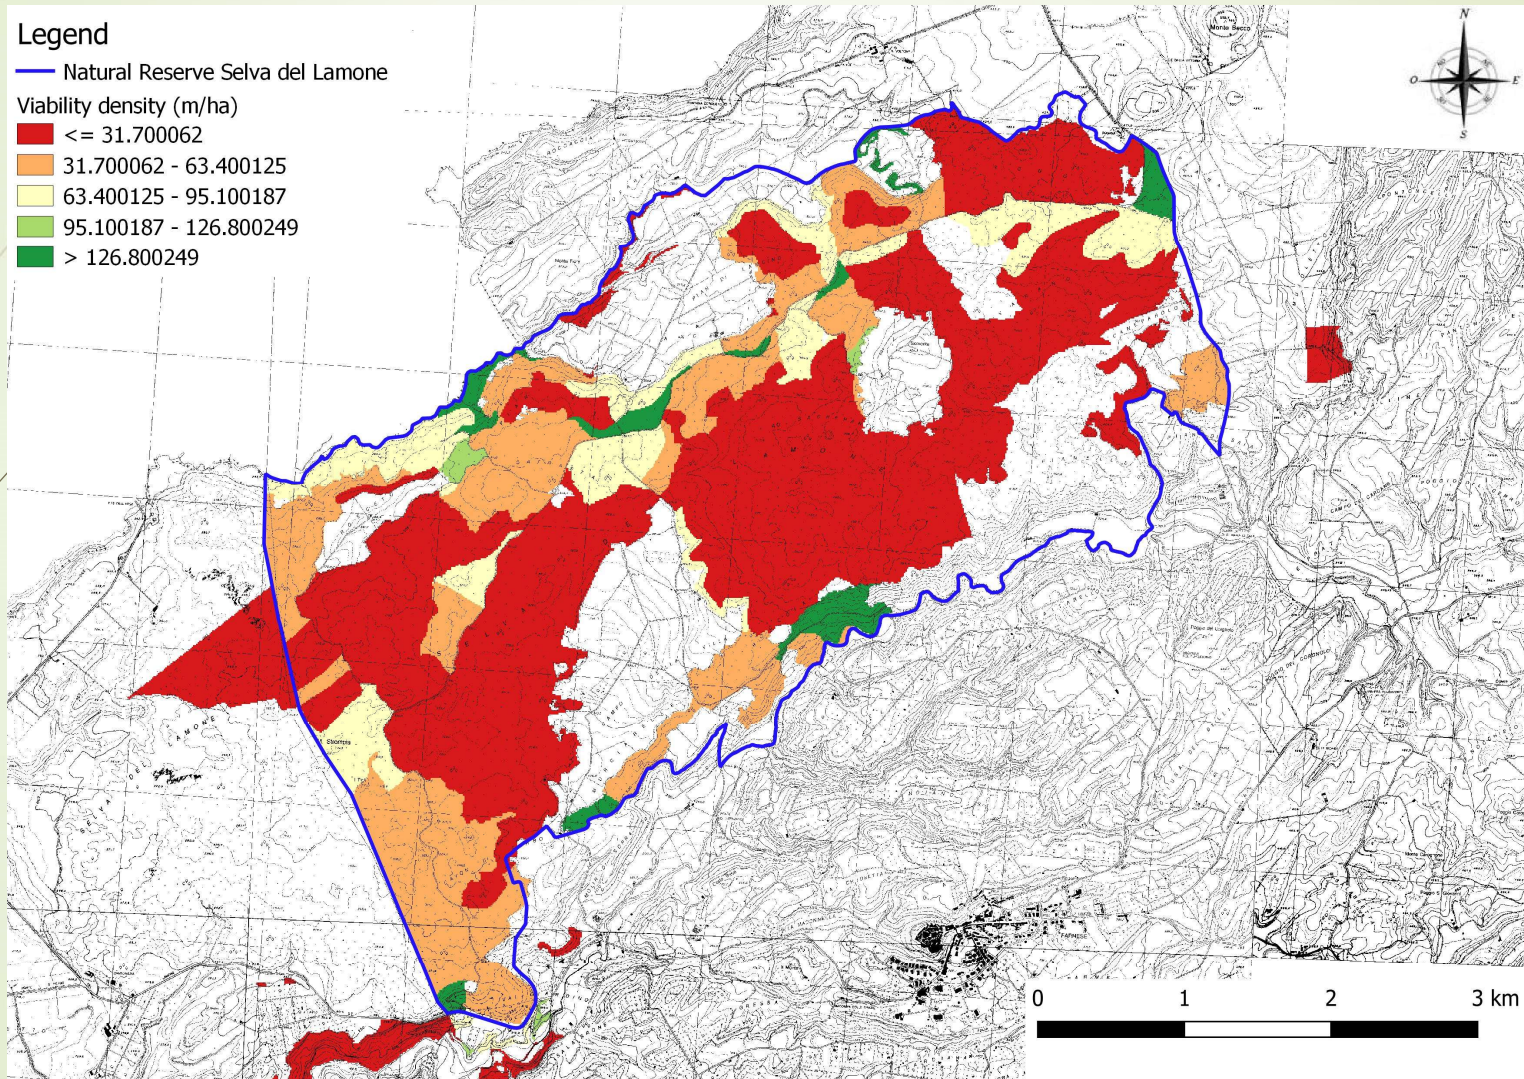

# Roughness

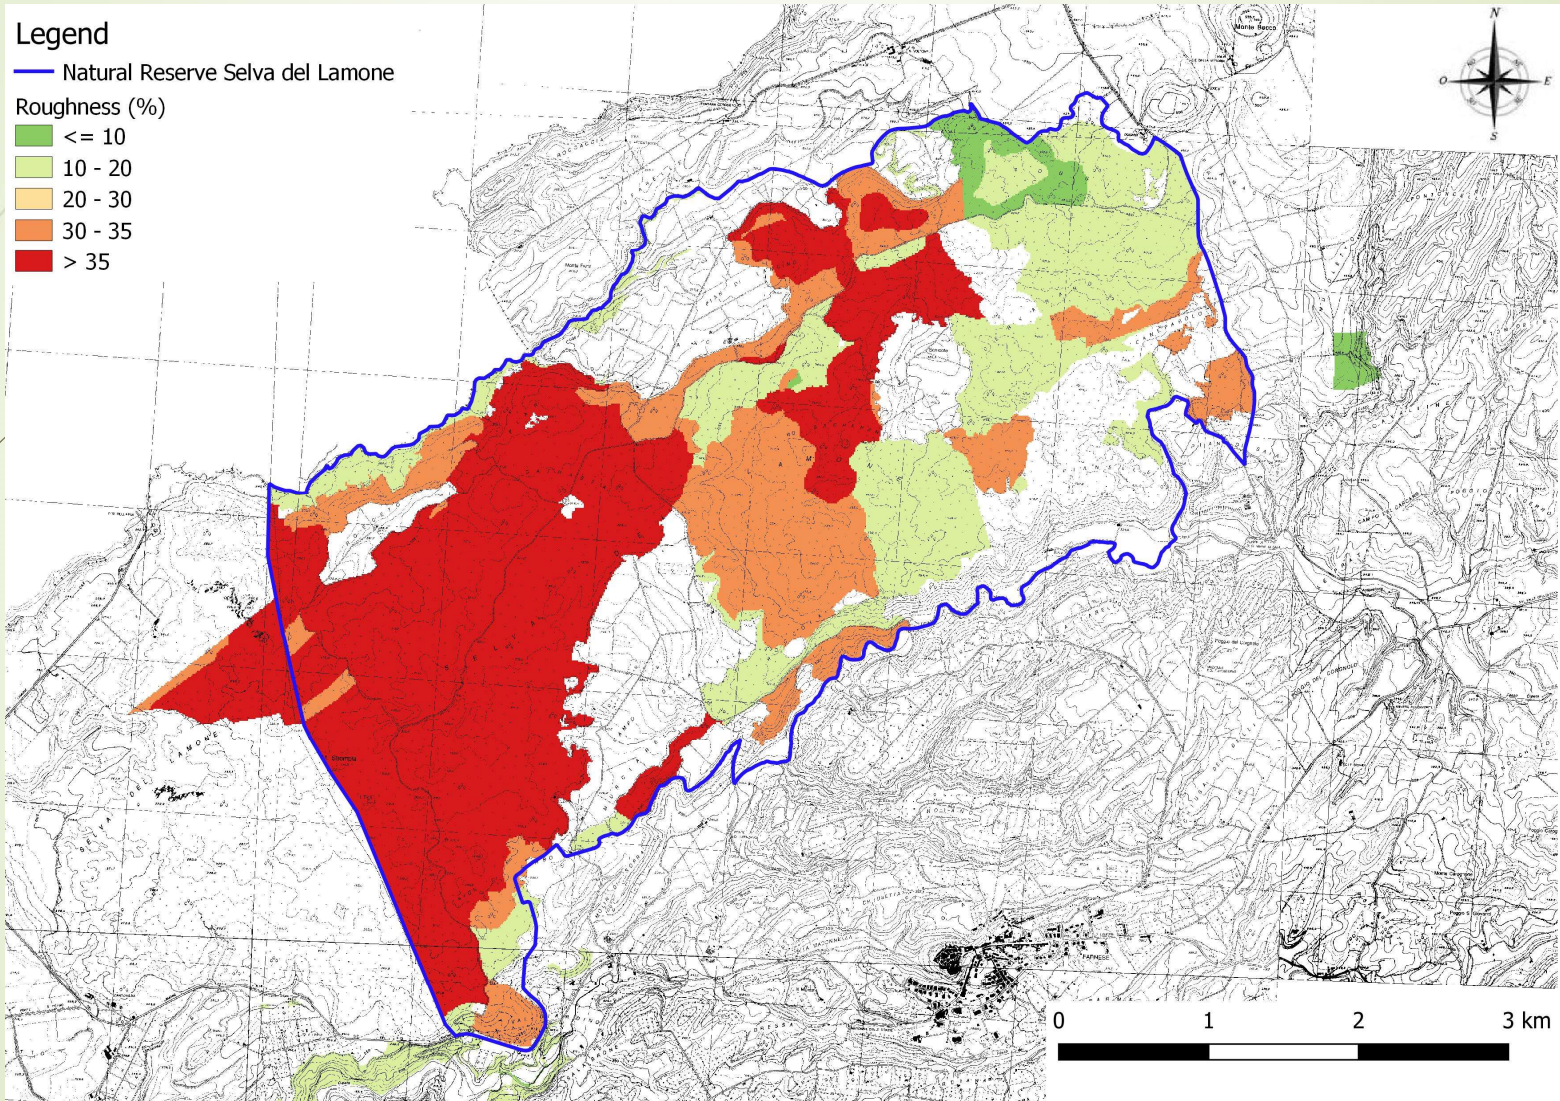

| Extraction System           | Criteria  |       |                     |       |                       |       |                                          |       |                             |       |           |       |
|-----------------------------|-----------|-------|---------------------|-------|-----------------------|-------|------------------------------------------|-------|-----------------------------|-------|-----------|-------|
|                             | Slope     |       | Extraction Distance |       | Soil Bearing Capacity |       | Extracted Timber Amount                  |       | Road Density                |       | Roughness |       |
|                             | Range (%) | Score | Range (m)           | Score | Range (kPa)           | Score | Range (m <sup>3</sup> ha <sup>-1</sup> ) | Score | Range (m ha <sup>-1</sup> ) | Score | Range (%) | Score |
| Forwarder                   | 0-20      | 5     | 0-100               | 5     | >80                   | 5     | >200                                     | 5     | >207                        | 5     | 0-15      | 5     |
|                             | 20-40     | 4     | 100-200             | 5     | 60-80                 | 4     | 100-200                                  | 4     | 138-207                     | 4     | 15-30     | 4     |
|                             | 40-60     | 1     | 200-400             | 4     | 40-60                 | 2     | 80-100                                   | 3     | 69-138                      | 3     | 30-45     | 1     |
|                             | >60       | 0     | >400                | 1     | <40                   | 0     | <80                                      | 1     | <69                         | 1     | >45       | 0     |
| Cable Skidder               | 0-20      | 5     | 0-100               | 5     | >80                   | 5     | >200                                     | 5     | >207                        | 5     | 0-15      | 5     |
|                             | 20-40     | 5     | 100-200             | 1     | 60-80                 | 5     | 100-200                                  | 5     | 138-207                     | 5     | 15-30     | 5     |
|                             | 40-60     | 4     | 200-400             | 0     | 40-60                 | 3     | 80-100                                   | 4     | 69-138                      | 4     | 30-45     | 4     |
|                             | >60       | 2     | >400                | 0     | <40                   | 1     | <80                                      | 3     | <69                         | 2     | >45       | 3     |
| Medium gravity Cable Yarder | 0-20      | 0     | 0-100               | 1     | >80                   | 5     | >200                                     | 5     | >207                        | 5     | 0-15      | 5     |
|                             | 20-40     | 4     | 100-200             | 3     | 60-80                 | 5     | 100-200                                  | 5     | 138-207                     | 5     | 15-30     | 5     |
|                             | 40-60     | 5     | 200-400             | 5     | 40-60                 | 5     | 80-100                                   | 4     | 69-138                      | 4     | 30-45     | 5     |
|                             | >60       | 5     | >400                | 5     | <40                   | 3     | <80                                      | 1     | <69                         | 3     | >45       | 4     |

RTS

Forwarder

| Criteria | S | ED | SBC | ETA | RD | RG | weights | CR         |
|----------|---|----|-----|-----|----|----|---------|------------|
| S        | 1 | 1  | 0.5 | 1   | 1  | 1  | 0.143   | 0.00<br>01 |
| ED       | - | 1  | 0.5 | 1   | 1  | 1  | 0.143   |            |
| SBC      | - | -  | 1   | 2   | 2  | 2  | 0.286   |            |
| ETA      | - | -  | -   | 1   | 1  | 1  | 0.143   |            |
| RD       | - | -  | -   | -   | 1  | 1  | 0.143   |            |
| RG       | - | -  | -   | -   | -  | 1  | 0.143   |            |

Cable Skidder

| Criteria | S | ED  | SBC | ETA | RD     | RG  | weights | CR        |
|----------|---|-----|-----|-----|--------|-----|---------|-----------|
| S        | 1 | 0.5 | 1   | 2   | 0.5    | 1   | 0.136   | 0.00<br>2 |
| ED       | - | 1   | 2   | 3   | 1      | 2   | 0.259   |           |
| SBC      | - | -   | 1   | 2   | 0.5    | 1   | 0.136   |           |
| ETA      | - | -   | -   | 1   | 0.3333 | 0.5 | 0.075   |           |
| RD       | - | -   | -   | -   | 1      | 2   | 0.259   |           |
| RG       | - | -   | -   | -   | -      | 1   | 0.136   |           |

Medium Gravity Cable Yarder

| Criteria | S | ED | SBC | ETA    | RD     | RG | weights | CR   |
|----------|---|----|-----|--------|--------|----|---------|------|
| S        | 1 | 1  | 3   | 0.3333 | 1      | 3  | 0.161   | 0.01 |
| ED       | - | 1  | 3   | 0.3333 | 1      | 3  | 0.161   |      |
| SBC      | - | -  | 1   | 0.2    | 0.3333 | 1  | 0.06    |      |
| ETA      | - | -  | -   | 1      | 3      | 5  | 0.399   |      |
| RD       | - | -  | -   | -      | 1      | 3  | 0.161   |      |
| RG       | - | -  | -   | -      | -      | 1  | 0.06    |      |

# Results: forwarder suitability

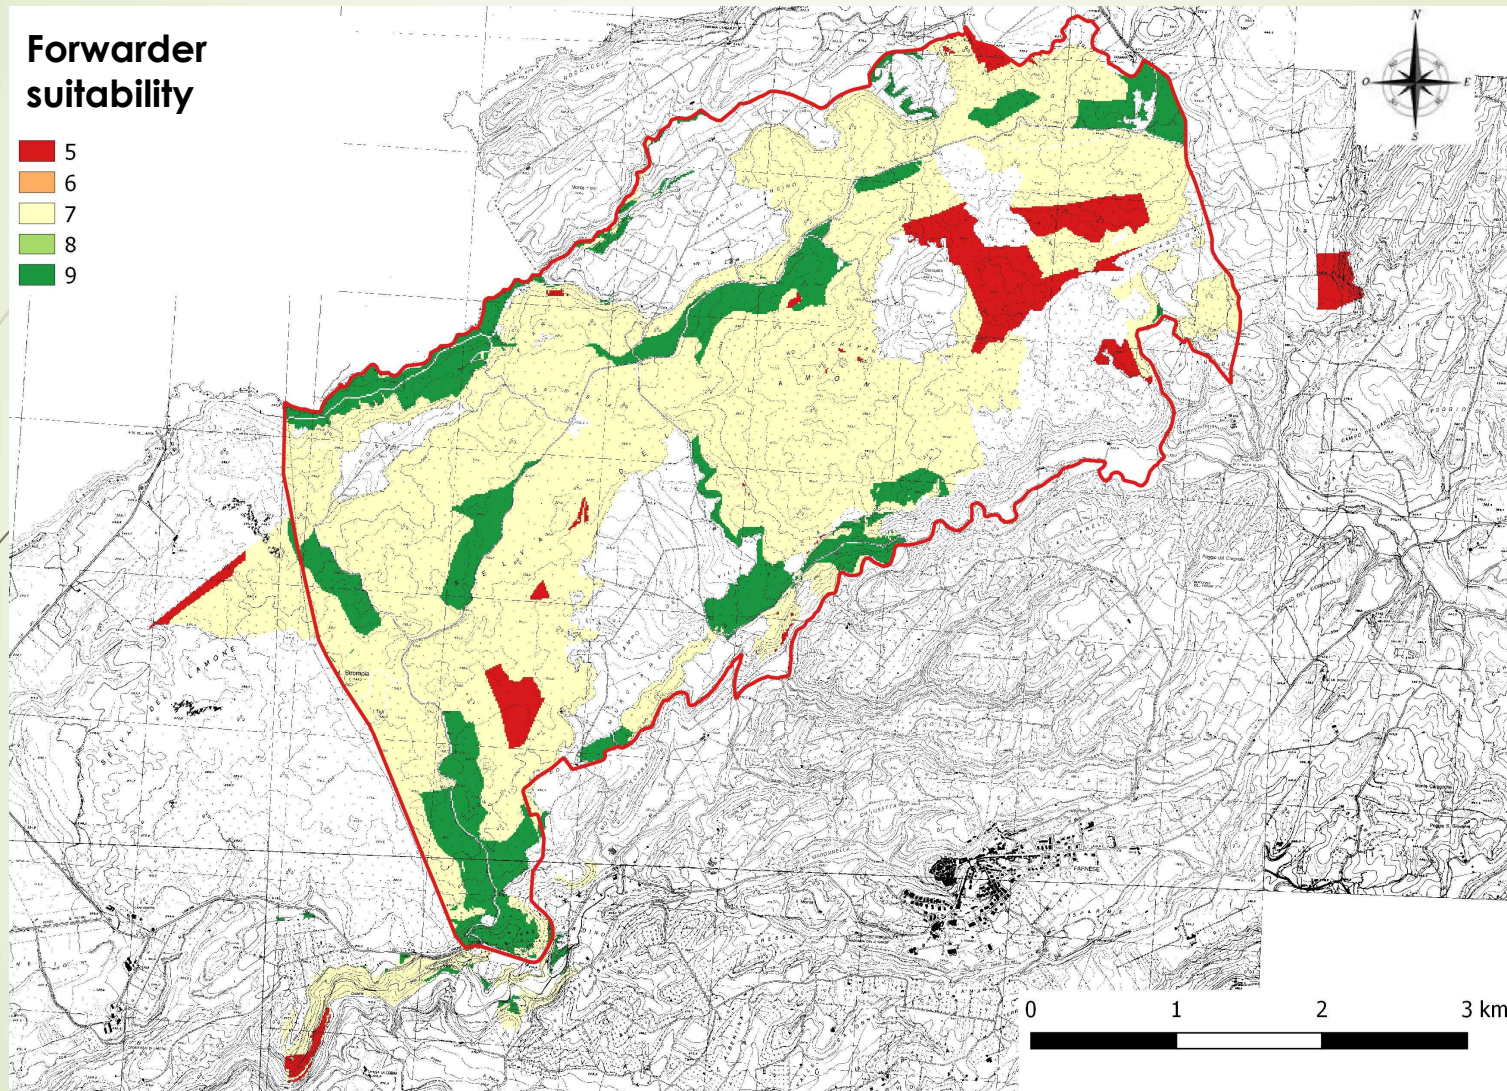

# Results: winch suitability

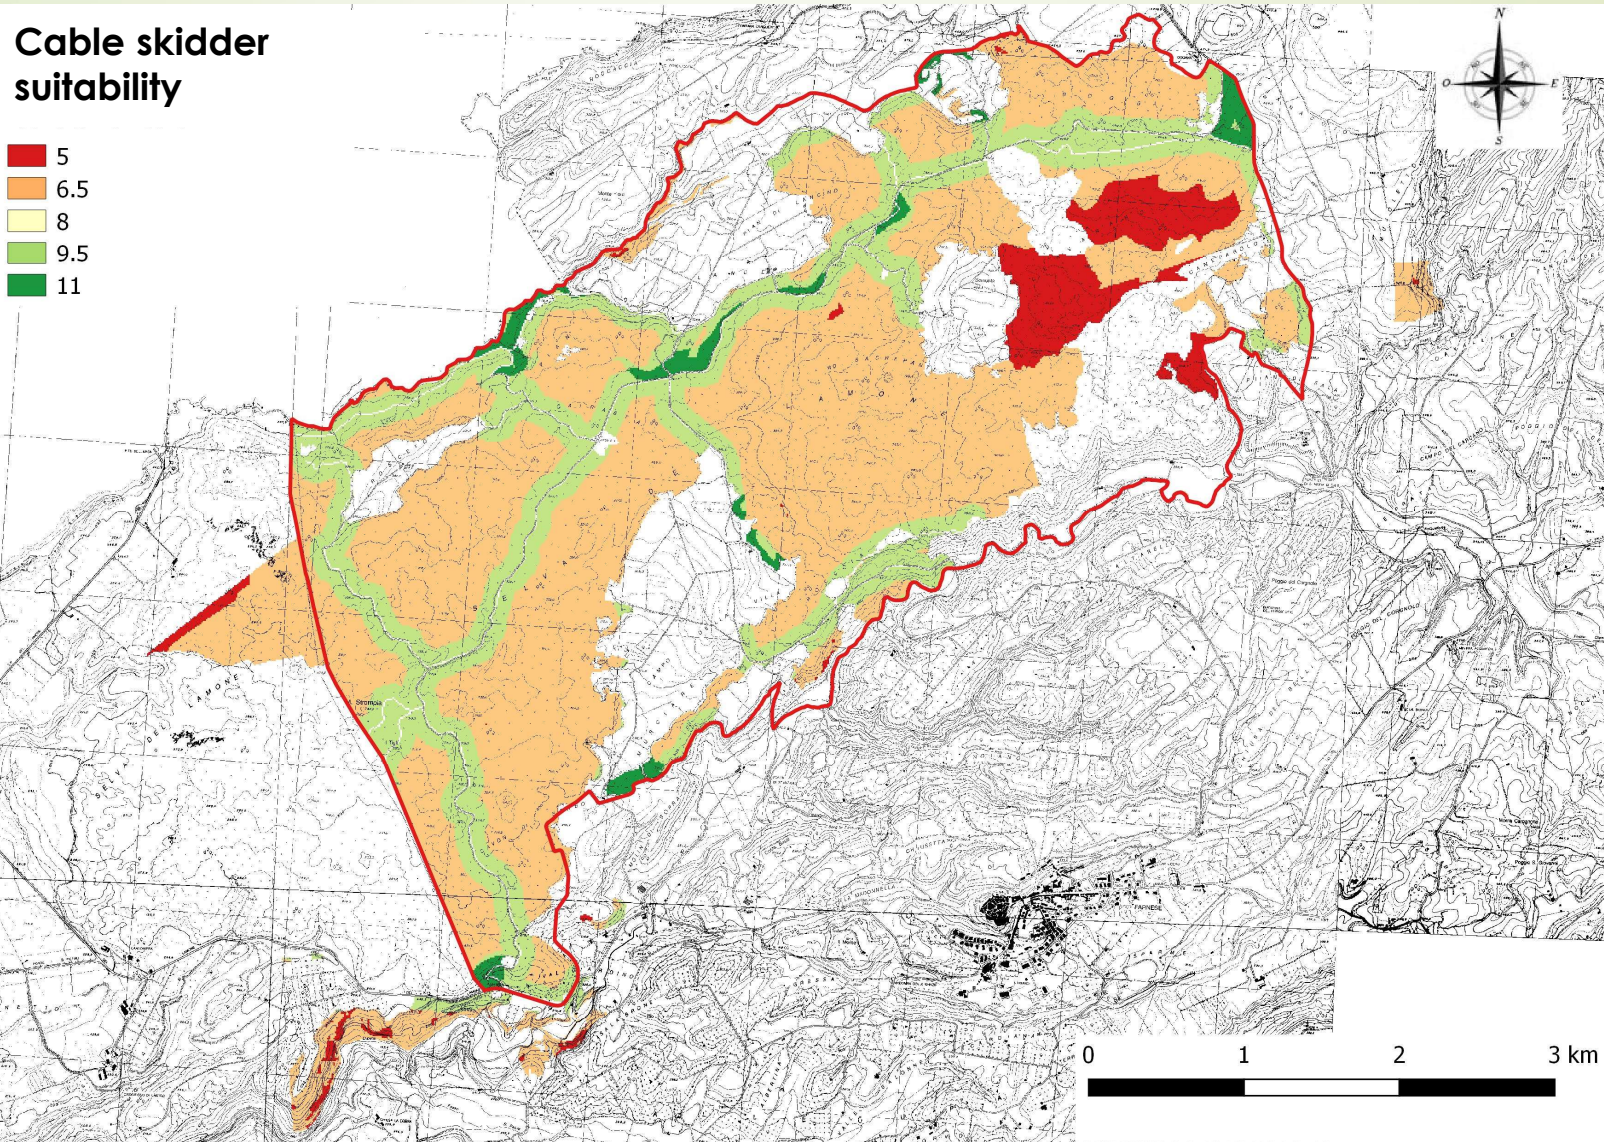

# Results: all-terrain cable yarder suitability

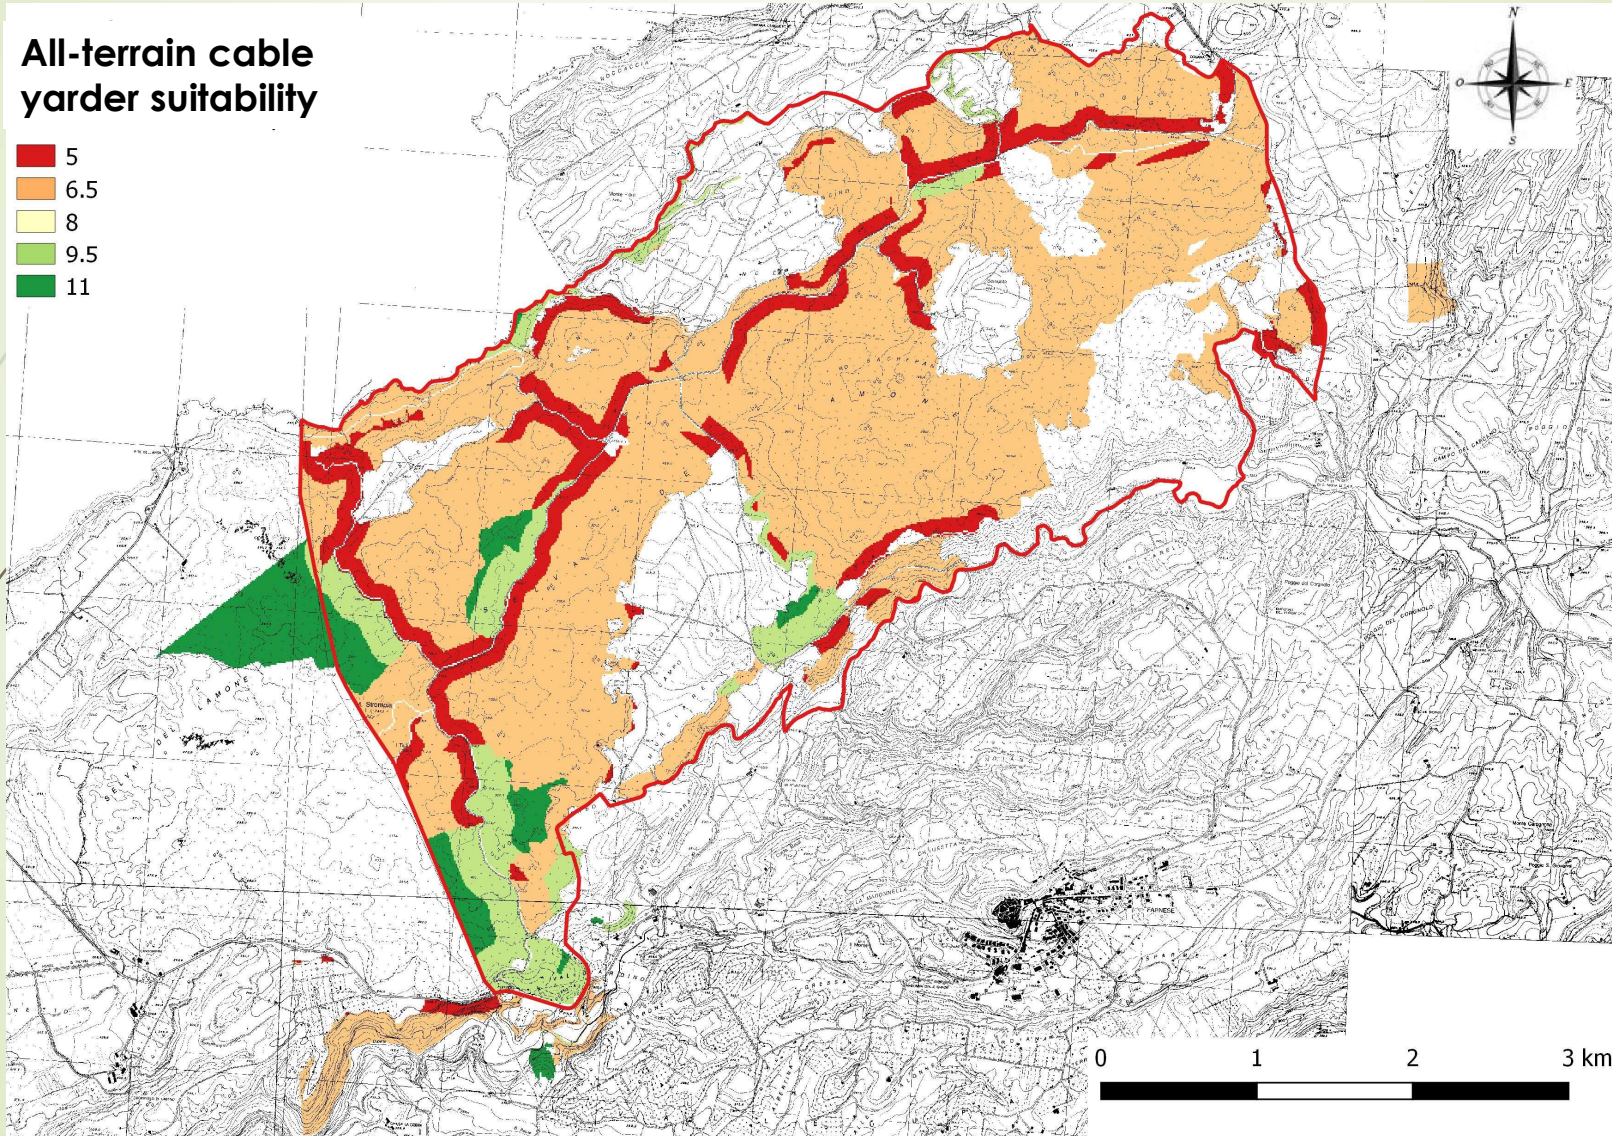



# Results: forest harvesting plan

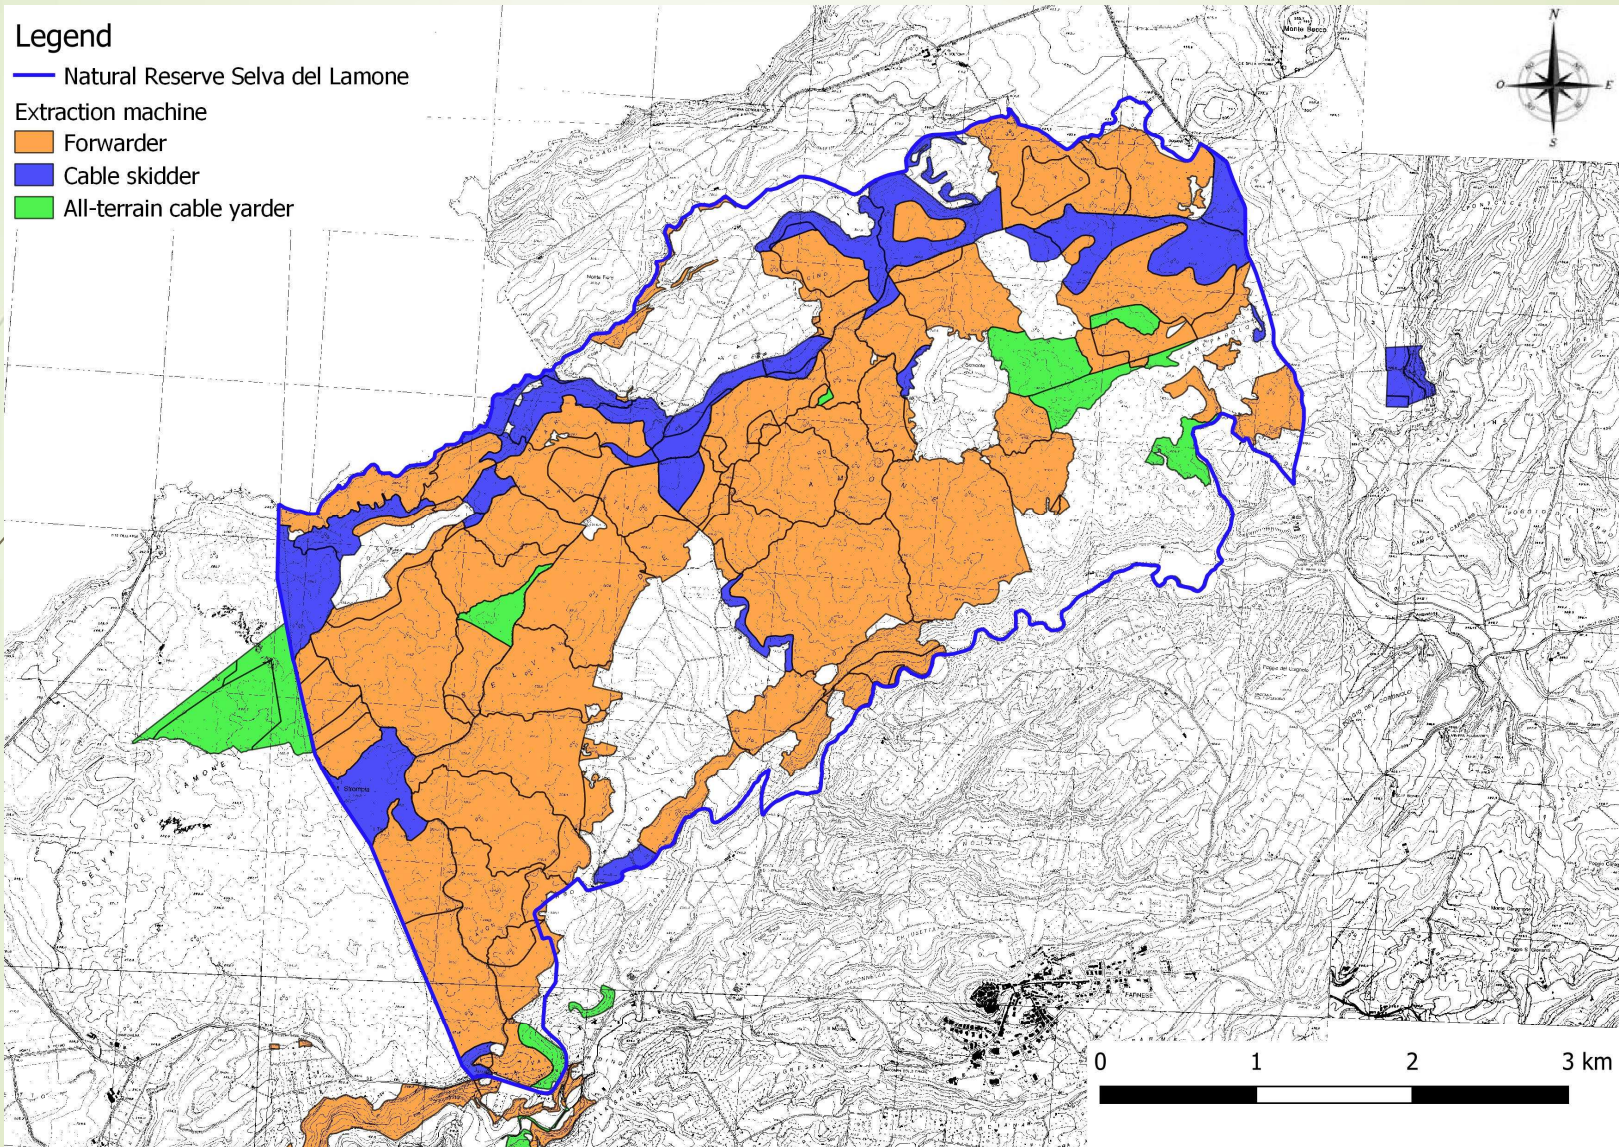

# Results: forest harvesting plan

Sub-compartments percentage

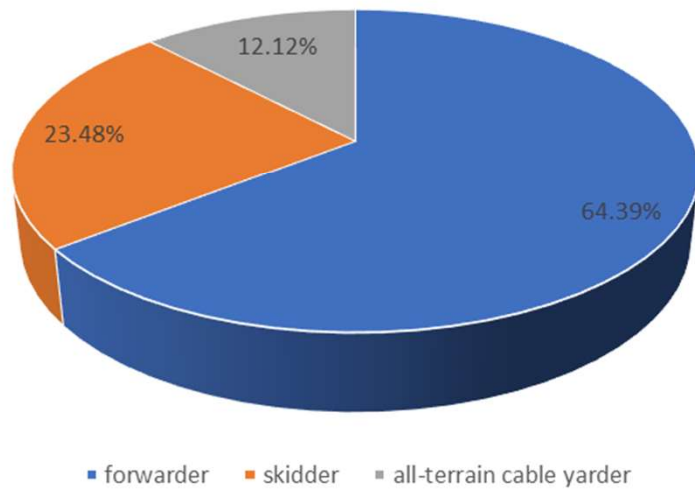

Surface percentage

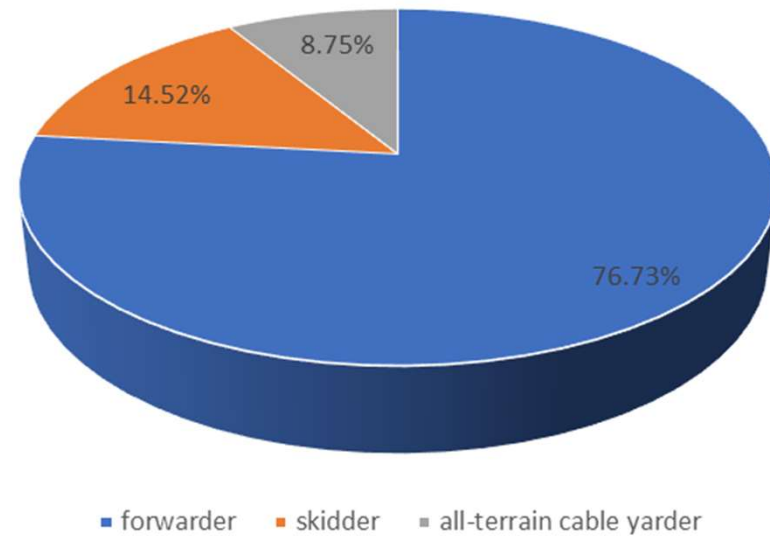

# Discussion

- The most important parameter for selecting a forwarder for timber extraction resulted to be soil bearing capacity
- To select a cable skidder the most influencing parameters were the ones related to the presence of current viability (viability density and extraction distance)
- For all-terrain cable yarder the most important parameter resulted to be the amount of extracted timber
- Forwarder resulted the system most suitable for the major part of the surface, cable skidder resulted suitable along the existing viability while all-terrain cable yarders resulted suitable in the presence of the highest extracted timber amount and in conditions of low soil bearing capacity
